# Supplementary material for: Pd-M (M = Ni, Co) Bimetallic Catalysts with Tunable Composition for Highly Efficient Electrochemical Formic Acid Oxidation
Source: MDPI journal article supplement (doi:10.3390/pr11061789), 2023-06-12
Supplement: s1 [file s1]

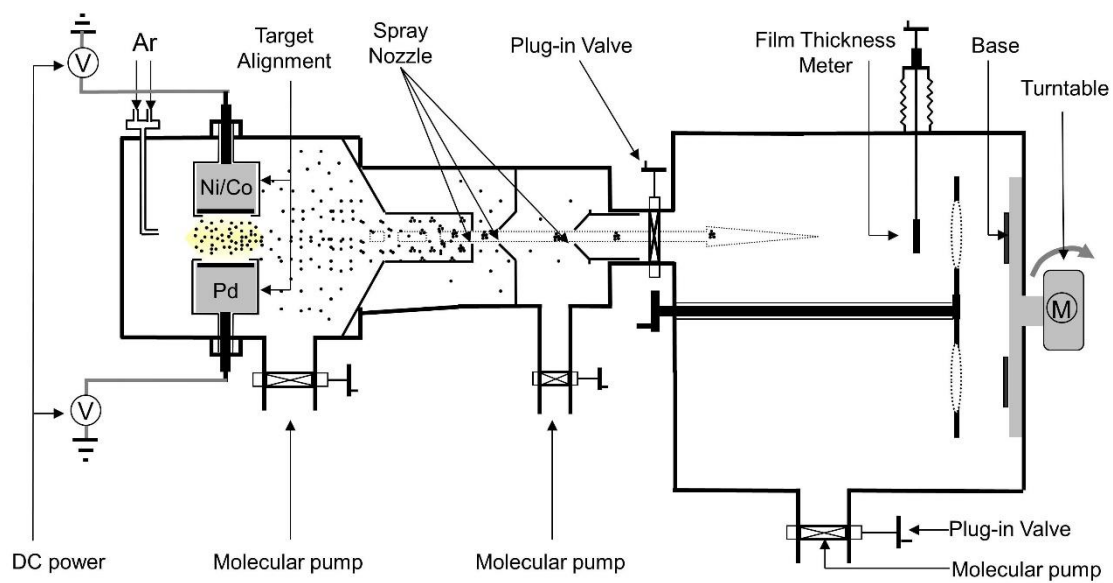

**Figure S1.** Schematic diagram of the nanoparticle beam composite deposition system.

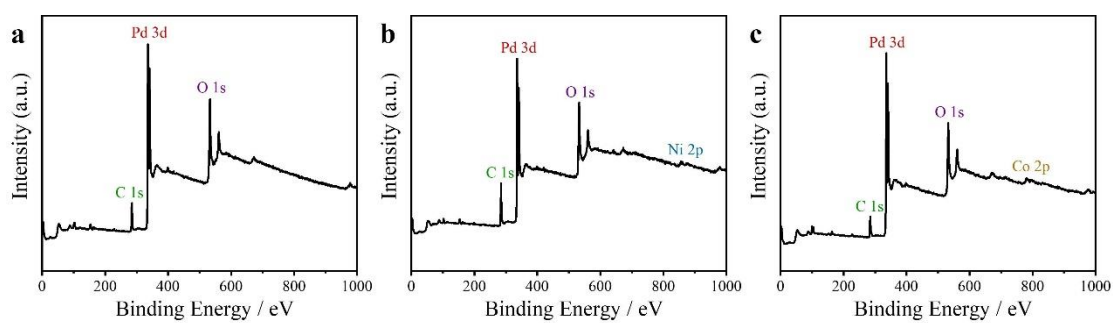

**Figure S2.** XPS survey spectra of (a) Pd, (b) PdNi-2 and (c) PdCo-3 catalysts.

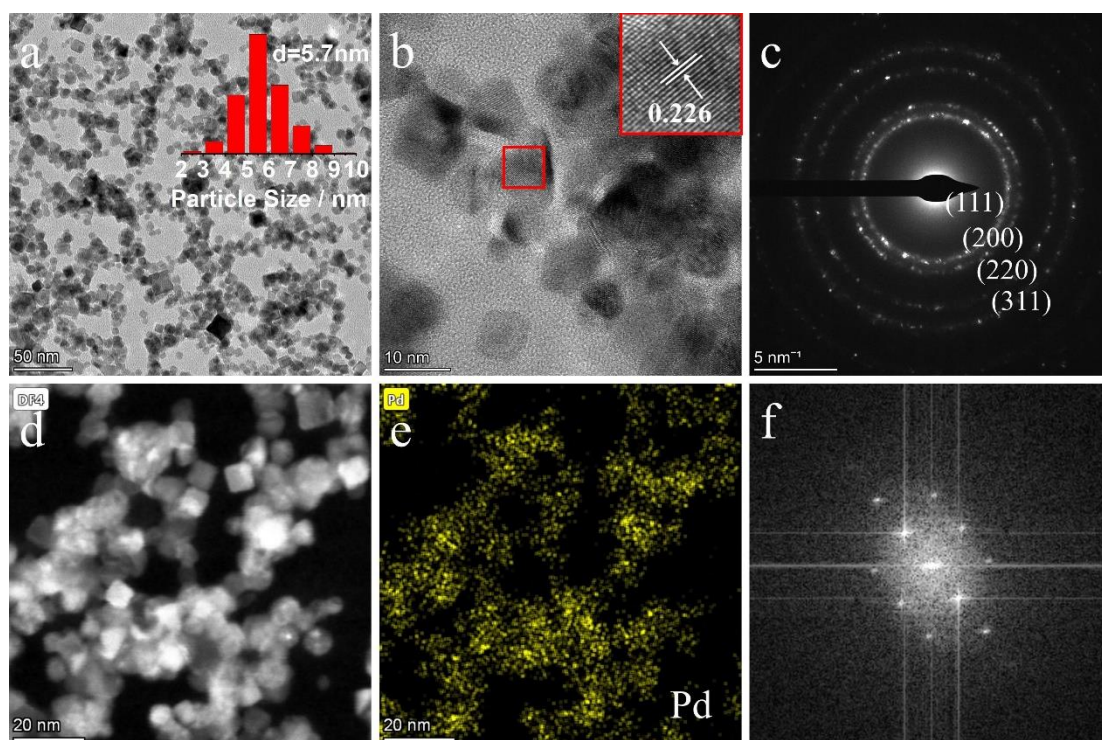

**Figure S3.** (a) TEM analysis and particle size histogram, (b) HRTEM analysis and local magnification, (c) SAED analysis, (d) HAADF-STEM analysis, (e) elemental mapping image, (f) FFT analysis of Pd catalyst.

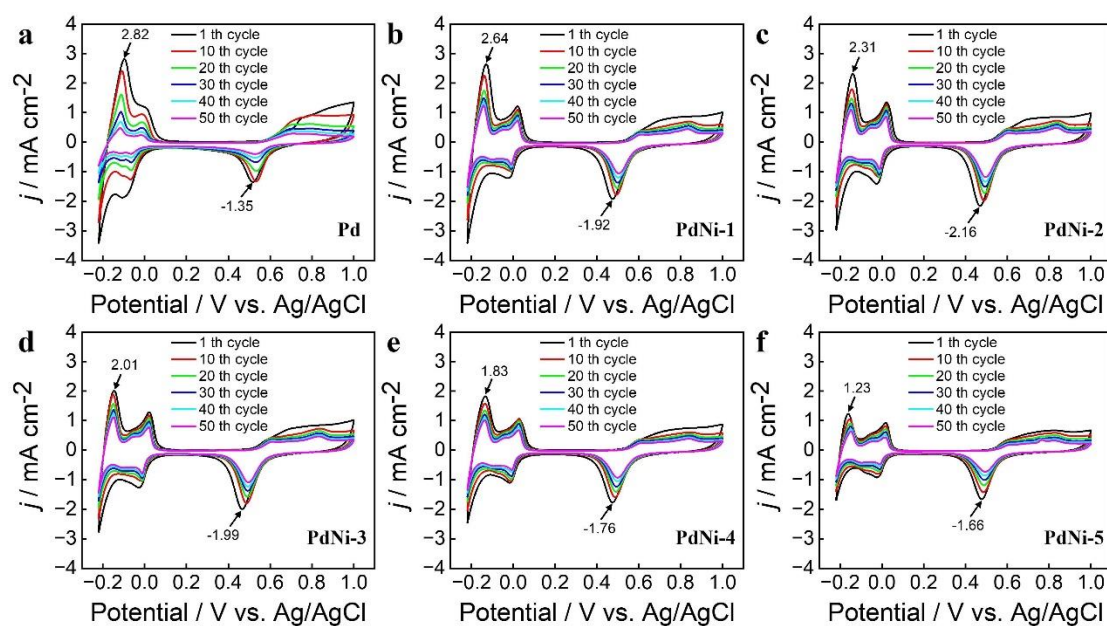

**Figure S4.** Repeated 50 cycles CV curves of (a) Pd, (b) PdNi-1, (c) PdNi-2, (d) PdNi-3, (e) PdNi-4 and (f) PdNi-5 electrocatalysts tested in 0.5 M  $\text{H}_2\text{SO}_4$  solution (scan rate =  $50 \text{ mV s}^{-1}$ ).

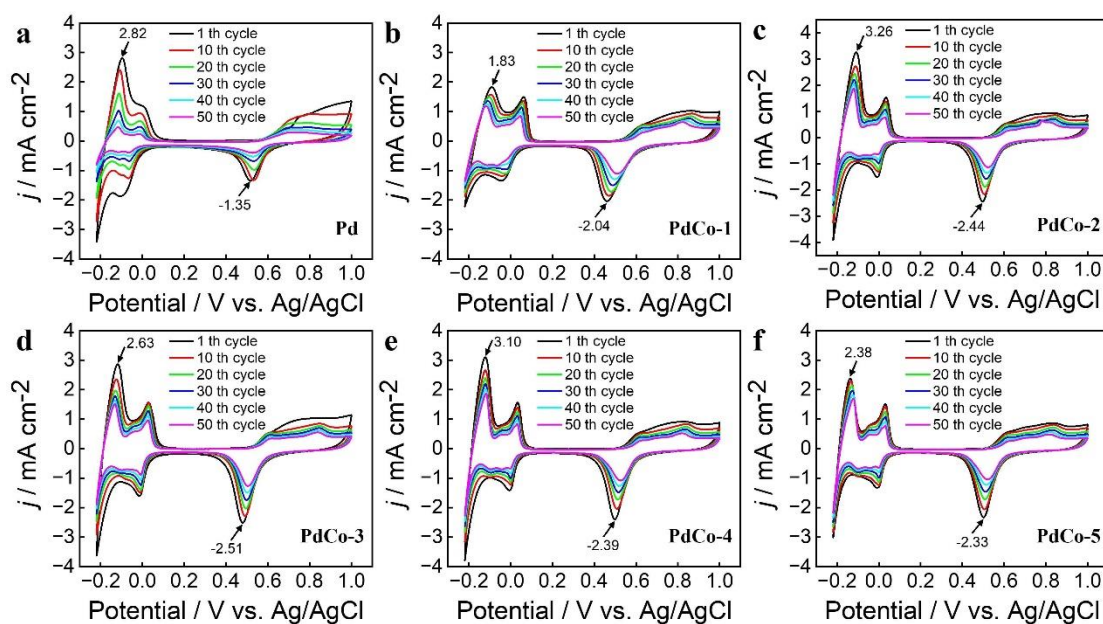

**Figure S5.** Repeated 50 cycles CV curves of (a) Pd, (b) PdCo-1, (c) PdCo-2, (d) PdCo-3, (e) PdCo-4 and (f) PdCo-5 electrocatalysts tested in 0.5 M  $\text{H}_2\text{SO}_4$  solution (scan rate = 50  $\text{mV s}^{-1}$ ).

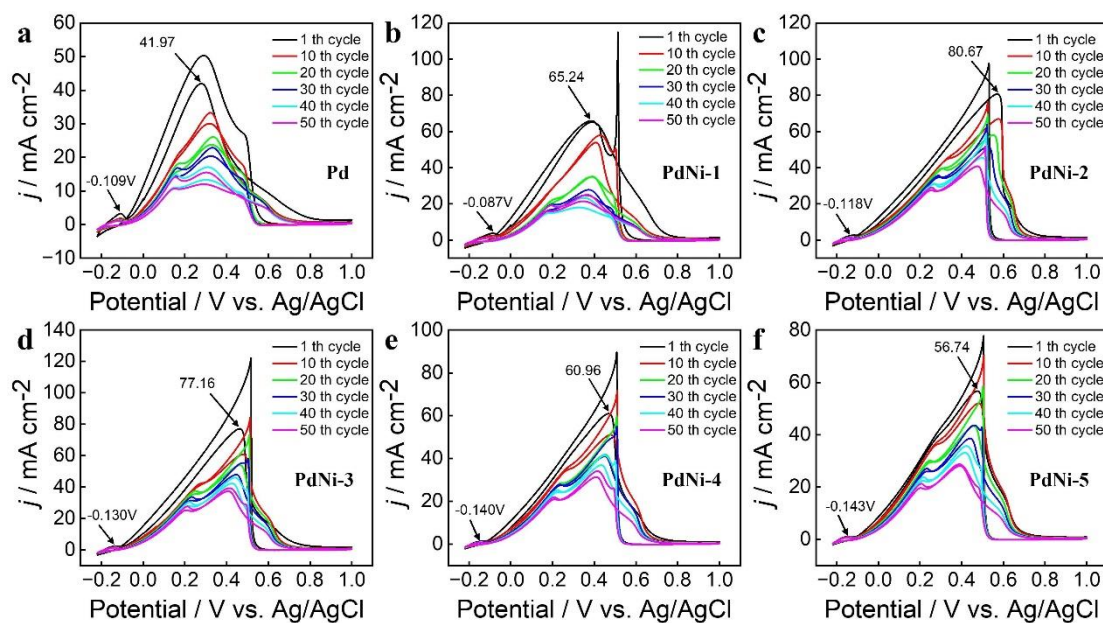

**Figure S6.** Repeated 50 cycles CV curves of (a) Pd, (b) PdNi-1, (c) PdNi-2, (d) PdNi-3, (e) PdNi-4 and (f) PdNi-5 electrocatalysts tested in 0.5 M  $\text{H}_2\text{SO}_4$  + 0.5 M  $\text{HCOOH}$  solution (scan rate = 50  $\text{mV s}^{-1}$ ).

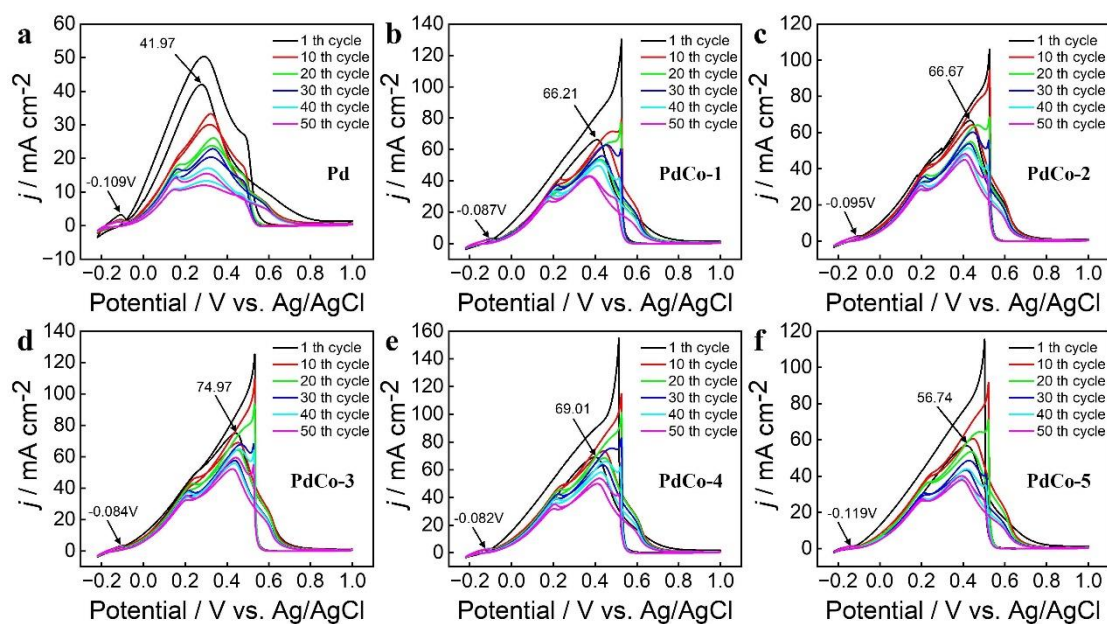

**Figure S7.** Repeated 50 cycles CV curves of (a) Pd, (b) PdCo-1, (c) PdCo-2, (d) PdCo-3, (e) PdCo-4 and (f) PdCo-5 electrocatalysts tested in 0.5 M  $\text{H}_2\text{SO}_4$  + 0.5 M  $\text{HCOOH}$  solution (scan rate = 50  $\text{mV s}^{-1}$ ).
