# Supplementary material for: Pd-M (M = Ni, Co) Bimetallic Catalysts with Tunable Composition for Highly Efficient Electrochemical Formic Acid Oxidation
Source: MDPI journal article supplement (doi:10.3390/pr11061789), 2023-06-12
Supplement: s1 [file s1]

Archive with 1 entries (1 files):
- processes-2437455-supplementary.pdf
